# Supplementary material
Source: PubMed Central journal article supplement (PMC3516436)
Supplement: supp_125.18.4253_JCS097428.pdf [file supp_125.18.4253_JCS097428.pdf]

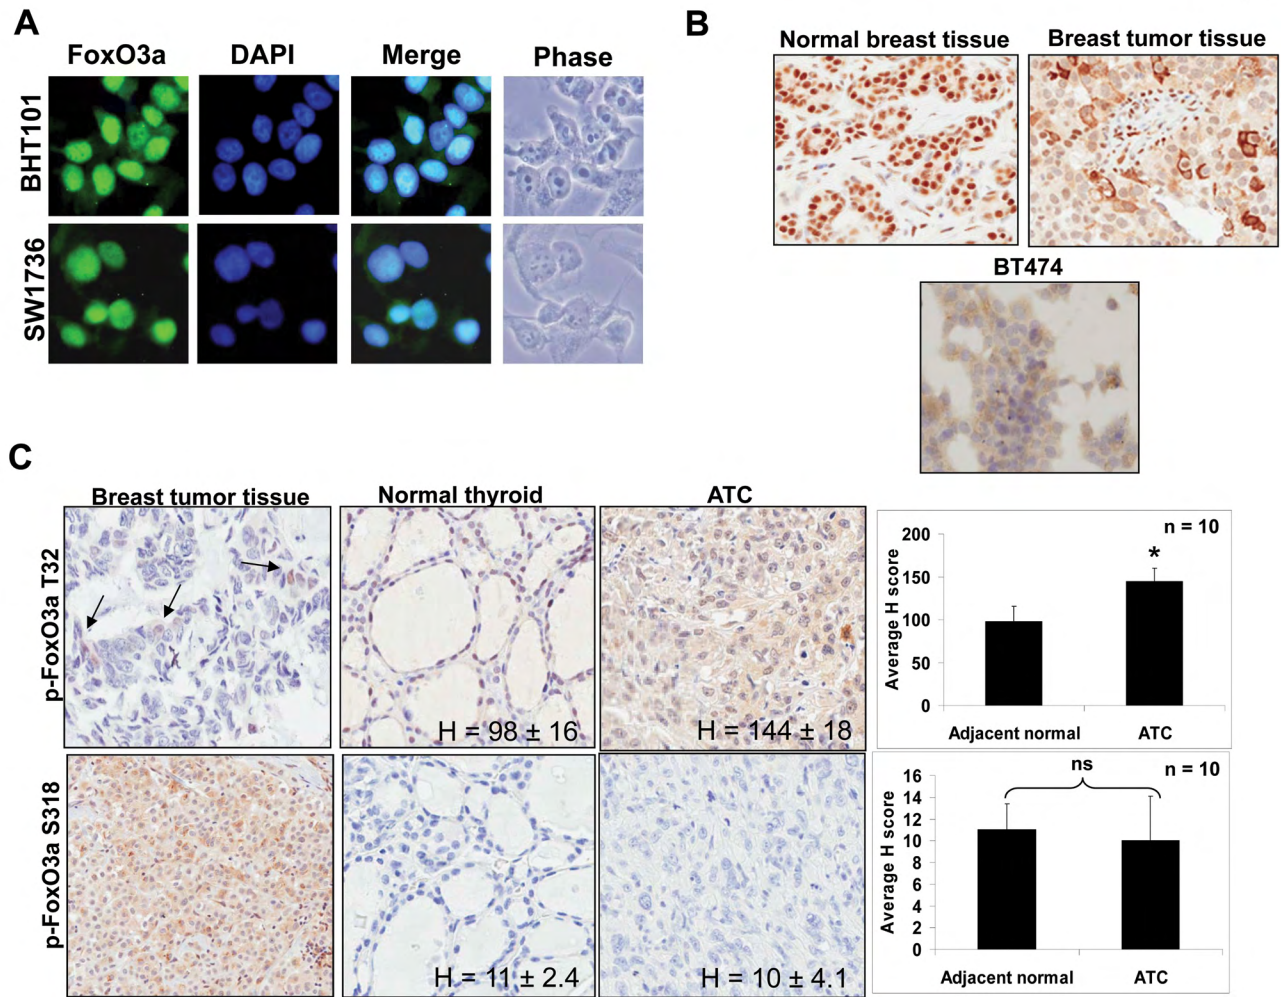

**Fig. S1. FoxO3a localization.** A. ICC shows nuclear localization of FoxO3a in BHT101 and SW1736 cells. DAPI staining is used as a nuclear control. B. IHC of normal and tumor breast tissue (n=10) and ICC of BT474 cells that were stained using IHC methods showed nuclear staining in normal breast tissue and cytoplasmic FoxO3a staining in a breast carcinoma tissue and cell line. C. IHC in adjacent normal thyroid and ATC patient tissues demonstrates little to no phosphorylation of FoxO3a at S318, while it is phosphorylated at T32 as shown by H scores (n=10). Breast tissue was used as a positive control.

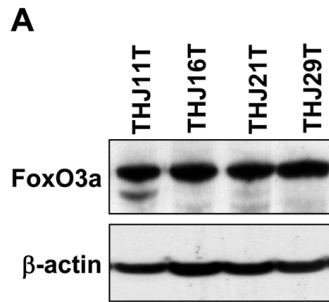

**B**

| Percent growth inhibition of control   |        |        |        |        |        |        |        |        |
|----------------------------------------|--------|--------|--------|--------|--------|--------|--------|--------|
|                                        | THJ11T |        | THJ16T |        | THJ21T |        | THJ29T |        |
| siRNA                                  | Expt 1 | Expt 2 |
| FoxO3a #1 siRNA                        | 80%    | >99%   | 71%    | 66%    | 64%    | 61%    | 86%    | 88%    |
| FoxO3a #6 siRNA                        | 85%    | 90%    | 49%    | 47%    | 47%    | 28%    | 80%    | 84%    |
| Non-silencing siRNA (Negative Control) | < 1%   | < 1%   | < 1%   | < 1%   | < 1%   | < 1%   | < 1%   | < 1%   |
| Lethal siRNA (Positive Control)        | >99%   | >99%   | >99%   | >99%   | >99%   | >99%   | >99%   | >99%   |

**Fig. S2. High throughput silencing of FoxO3a reduces proliferation.** **A.** Western blot shows that FoxO3a is expressed in the ATC cells.  $\beta$ -actin is the loading control. **B.** Data is presented as a table illustrating the growth inhibition of cell lines for 2 independent experiments in the presence of FoxO3a siRNA as compared to non-silencing siRNA (negative control). Lethal siRNA was used as a positive control.
